# Supplementary material for: Demographic and Socioeconomic Correlates of Disproportionate Beef Consumption among US Adults in an Age of Global Warming
Source: MDPI journal article supplement (doi:10.3390/nu15173795), 2023-08-30
Supplement: s1 [file s1]

**Supplemental Table S1. Percent of total ounce-equivalents of beef consumption from top 20 food categories, by age and gender, NHANES 2015-2018 (N=10,238)**

| USDA Code                                 | Food category description                        | Females |        |        |        | Males  |        |        |        |
|-------------------------------------------|--------------------------------------------------|---------|--------|--------|--------|--------|--------|--------|--------|
|                                           |                                                  | 18-29y  | 30-49y | 50-65y | 66+ y  | 18-29y | 30-49y | 50-65y | 66+ y  |
|                                           |                                                  | N=1044  | N=1668 | N=1442 | N=1125 | N=974  | N=1457 | N=1400 | N=1125 |
| 2002                                      | Beef, excludes ground                            | 27.2%   | 26.6%  | 26.9%  | 22.6%  | 25.4%  | 39.8%  | 35.8%  | 23.2%  |
| 3702                                      | Burgers (single code)                            | 19.8%   | 18.0%  | 15.5%  | 10.1%  | 23.4%  | 19.5%  | 15.5%  | 19.4%  |
| 3002                                      | Meat mixed dishes                                | 14.4%   | 15.9%  | 19.4%  | 26.4%  | 13.6%  | 7.4%   | 13.1%  | 19.0%  |
| 3502                                      | Burritos and tacos                               | 9.5%    | 8.9%   | 3.2%   | 5.6%   | 8.2%   | 5.5%   | 3.9%   | 2.7%   |
| 2602                                      | Cold cuts and cured meats                        | 4.7%    | 3.6%   | 5.2%   | 7.8%   | 5.8%   | 4.1%   | 7.4%   | 8.7%   |
| 2004                                      | Ground beef                                      | 1.5%    | 3.5%   | 9.6%   | 6.1%   | 3.7%   | 2.3%   | 5.1%   | 6.2%   |
| 3703                                      | Frankfurter sandwiches (single code)             | 3.6%    | 4.7%   | 2.3%   | 4.5%   | 5.1%   | 4.4%   | 3.5%   | 4.3%   |
| 2608                                      | Sausages                                         | 2.3%    | 4.1%   | 1.9%   | 1.2%   | 1.6%   | 1.9%   | 1.6%   | 4.7%   |
| 3802                                      | Soups                                            | 0.9%    | 3.2%   | 3.6%   | 2.7%   | 0.5%   | 2.6%   | 1.1%   | 1.9%   |
| 3204                                      | Pasta mixed dishes, excludes macaroni and cheese | 2.3%    | 1.7%   | 2.2%   | 2.3%   | 1.8%   | 1.3%   | 2.3%   | 2.2%   |
| 3708                                      | Other sandwiches (single code)                   | 1.0%    | 1.4%   | 1.0%   | 1.7%   | 2.3%   | 1.6%   | 2.9%   | 2.4%   |
| 3602                                      | Pizza                                            | 2.8%    | 1.8%   | 1.0%   | 1.1%   | 2.3%   | 2.1%   | 1.6%   | 0.7%   |
| 3404                                      | Stir-fry and soy-based sauce mixtures            | 2.3%    | 0.9%   | 1.4%   | 2.2%   | 1.2%   | 1.3%   | 1.5%   | 0.6%   |
| 3506                                      | Other Mexican mixed dishes                       | 1.3%    | 1.1%   | 2.5%   | 2.1%   | 0.8%   | 0.8%   | 0.7%   | 0.6%   |
| 3706                                      | Egg/breakfast sandwiches (single code)           | 0.6%    | 1.3%   | 0.7%   | 0.8%   | 1.1%   | 1.3%   | 0.6%   | 0.7%   |
| 2606                                      | Frankfurters                                     | 0.9%    | 0.7%   | 0.6%   | 1.2%   | 0.6%   | 1.3%   | 0.7%   | 1.7%   |
| 3504                                      | Nachos                                           | 0.4%    | 0.5%   | 0.1%   | 0.0%   | 0.7%   | 0.9%   | 0.1%   | 0.0%   |
| 3206                                      | Macaroni and cheese                              | 1.9%    | 0.6%   | 0.1%   | 0.1%   | 0.4%   | 0.4%   | 0.0%   | 0.0%   |
| 3402                                      | Fried rice and lo/chow mein                      | 0.0%    | 0.1%   | 0.5%   | 0.0%   | 0.3%   | 0.4%   | 0.8%   | 0.0%   |
| 3208                                      | Turnovers and other grain-based items            | 0.8%    | 0.2%   | 0.3%   | 0.4%   | 0.4%   | 0.4%   | 0.3%   | 0.1%   |
| <b>Percent of total beef consumption:</b> |                                                  | 98.1%   | 98.9%  | 97.9%  | 98.9%  | 99.1%  | 99.4%  | 98.4%  | 98.9%  |

**Notes:** Food groups are based on USDA's WWEIA (What We Eat in America) Food Categories. Data are from adults aged 18+ years with reliable day 1 diet recalls in the 2015-2018 NHANES (n=10,248, representing a population of 244,067,443). Ounce-equivalents are the unit used in the USDA Food Patterns Equivalents Database and represent the lean fraction of protein-rich foods. Additional fat from non-lean beef is allocated to the FPED solid fats category and is not represented here.
